# Supplementary material for: Fast and efficient synthesis of Zorro-LNA type 3′-5′-5′-3′ oligonucleotide conjugates via parallel in situ stepwise conjugation
Source: Royal Society of Chemistry journal article supplement (doi:10.1039/c6ob00211k), 2016-01-01
Supplement: c6ob00211k1.pdf [file c6ob00211k1.pdf]

Fast and Efficient Synthesis of Zorro-LNA Type 3'-5'-5'-3' Oligonucleotide  
Conjugates via parallel in-situ stepwise conjugation.

O.I. Gissberg,<sup>#a</sup> M. Jezowska<sup>#b</sup>, E. M. Zaghoul<sup>a</sup>, N.I. Bungsu<sup>a,c</sup>, R. Strömberg<sup>b</sup>, C.I.E. Smith<sup>a</sup>, K.  
E. Lundin<sup>\*a</sup>, and M. Honcharenko<sup>\*b</sup>

**Supplementary information**

- 1. Zorro constructs used in the study.**
- 2. 15% PAGE-UREA gel showing the migration of the different ONs.**
- 3. Examples of HPLC analysis from different Zorro arms constructs: A) crude oligonucleotide (ON)-PATA conjugate, B) crude oligonucleotide (ON)-N3 conjugate.**
- 4. Examples of HPLC analysis showing crude reaction mixtures of synthesis of Zorro Type 3'-5'-5'-3' oligonucleotide conjugates.**
- 5. Mass Spectra and HPLC Chromatograms of purified Zorro Type 3'-5'-5'-3' oligonucleotide conjugates.**
- 6. Representative gel illustrating the strand invasion assay.**

## 1. Zorro constructs used in the study

**Zorro constructs used in the study**

| Name   | overlap* | Sequence                                                        |
|--------|----------|-----------------------------------------------------------------|
| Z-2ON  | 1        | 3' -AgTcgCgTAccCACgGTCtAaCt-5'<br>5' -AGATtGACCCtCCtcTTtcTTCa3' |
| Z-2HEG | 1        | 3' -AgTcgCgTAccCACgG-HEG-HEG-CCctCCtcTTtcTTCa-3'                |
| Z2BS-1 | 1        | 3' -AgTcgCgTAccCACgG<br>CCctCCtcTTtcTTCa-3'                     |
| Z2BS-4 | 4        | 3' -AgTcgCgTAccCACgG<br>TGCCctCCtcTTtcTTCa-3'                   |
| Zi5-2  | 2        | 3' -GaAtcCctCcaAagG<br>CccCagCcaCccTctG-3'                      |
| Zi5-3  | 3        | 3' -CtcCggCacGaAcaAc<br>TtgCcAgaCtcTgCc-3'                      |

\* bases overlapping between the two arms when the construct is bound to its dsDNA target

## 2. 15% PAGE-UREA gel showing the migration of the different ONs.

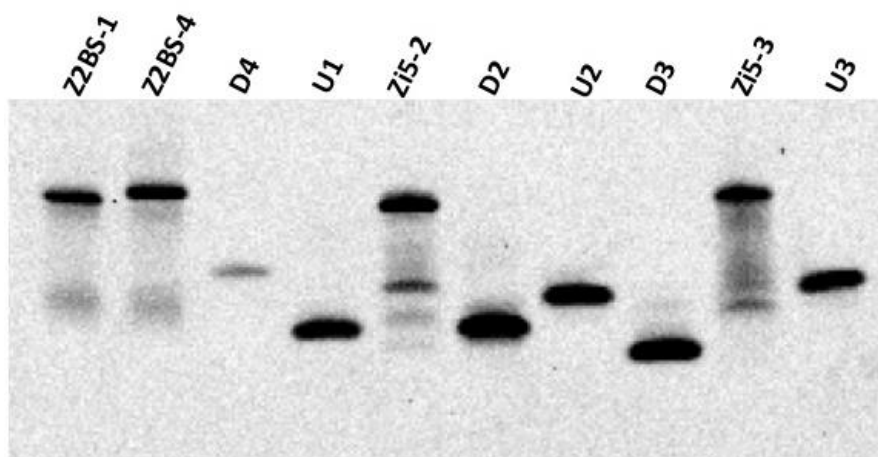

### 3. Examples of HPLC analysis from different Zorro arms constructs:

#### A) crude oligonucleotide (ON)-PATA conjugate,

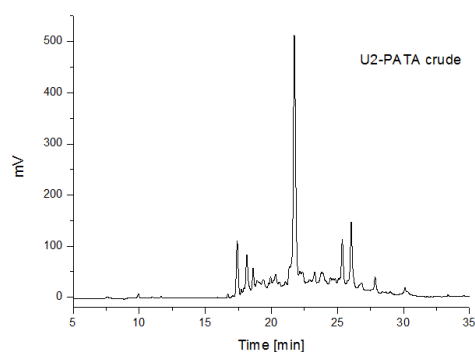

#### B) crude oligonucleotide (ON)-N3 conjugate.

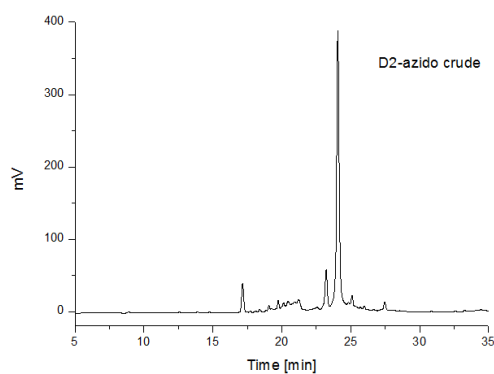

### 4. Examples of HPLC analysis showing crude reaction mixtures of synthesis of Zorro Type 3'-5'-5'-3' oligonucleotide conjugates.

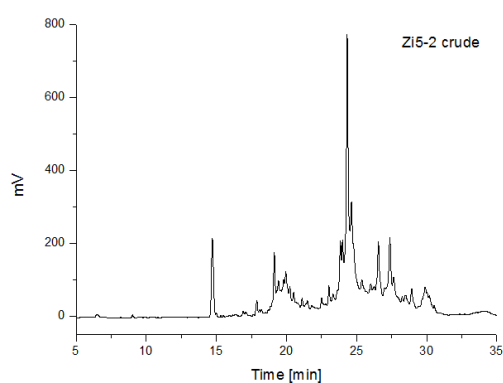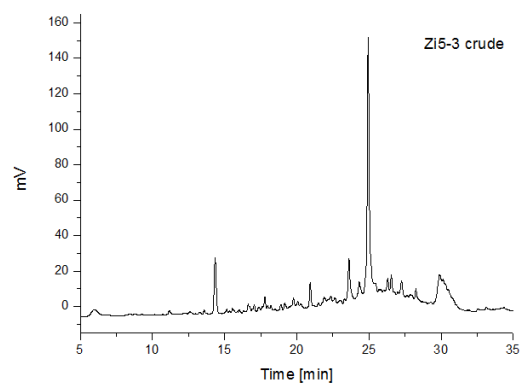

## 5. HPLC Chromatograms and Mass Spectra of purified Zorro Type 3'-5'-5'-3' oligonucleotide conjugates.

### Z2BS-1

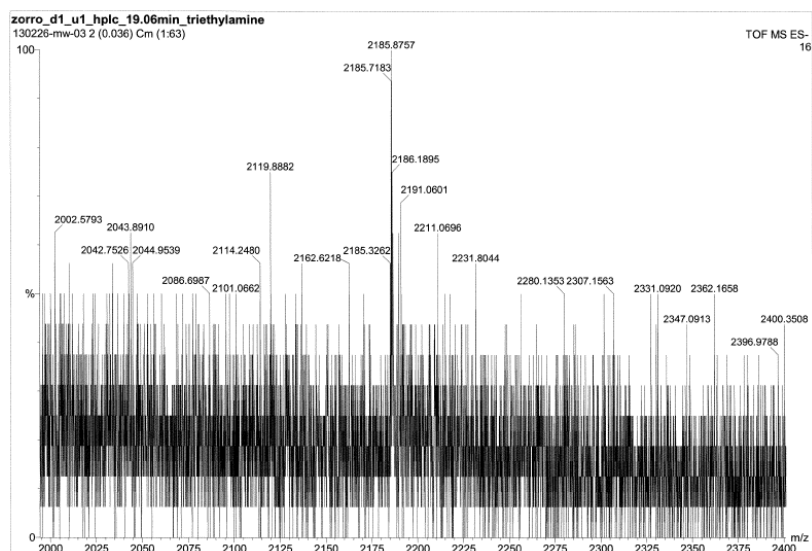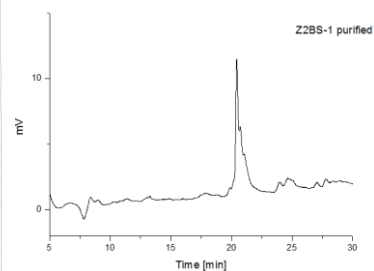

### Z2BS-4

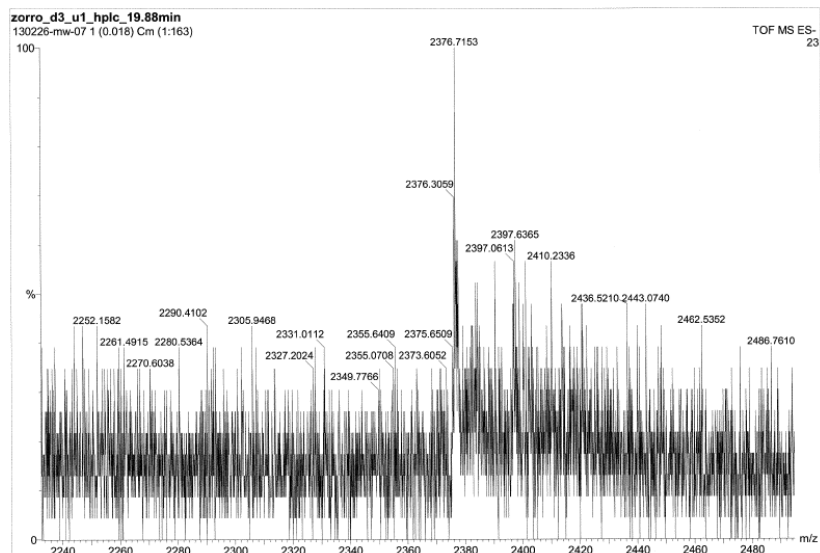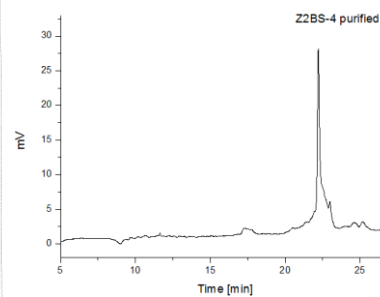

## Zi5-2

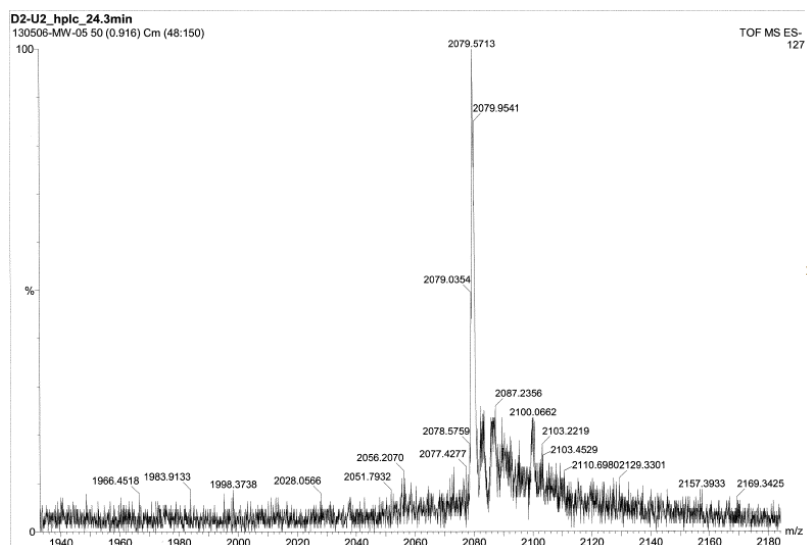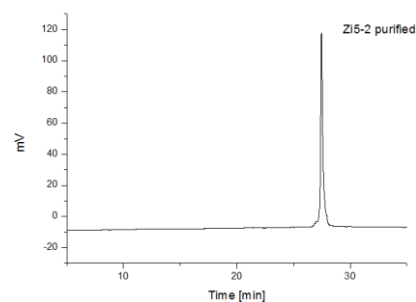

## Zi5-3

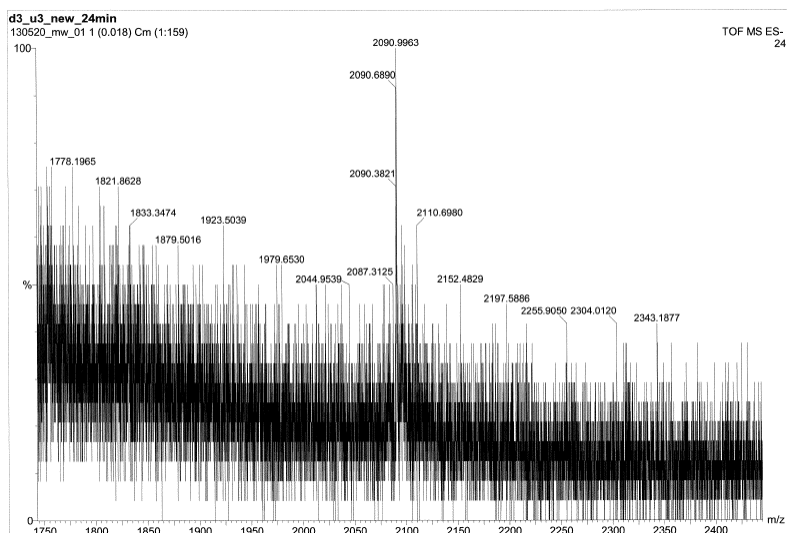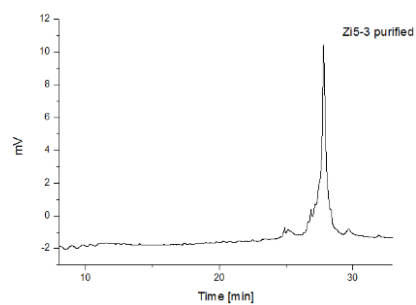

## 6. Representative gel illustrating the strand invasion assay.

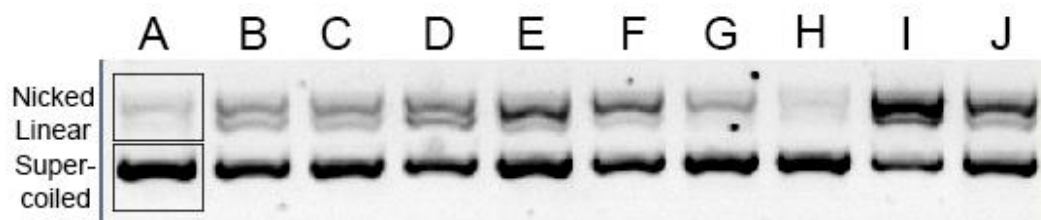

Plasmid together with ONs or Zorro constructs were incubated for 72 h at 37 °C and then treated with S1 nuclease and analyzed on a 1% agarose gel. The gel was stained with SYBR Gold and documented using the FluoroS gel documentation system (BioRad) equipped with a cooled CCD camera. The different plasmid fractions were quantified using the Quantity One software (BioRad). Lane **A** = plasmid pN25-2BS alone, **B** = Z2BS-4, **C** = Z2BS-1, **D** = U1 + D4, **E** = U1+D1, **F** = D4, **G** = D1, **H** = U1, **I** = Z-2HEG and **J** = Z-2ON. As a result of the strand invasion one DNA strand is displaced and creates a single stranded region in the plasmid. The S1 nuclease cleaves the single stranded DNA which results in increased bands corresponding to nicked and linear plasmid in relation to super coiled DNA. To calculate the strand invasion the value for the supercoiled band was divided by the total from the supercoiled + nicked + linearized bands and the ratio is then normalized to the ratio achieved for plasmid alone.
